# Supplementary material for: Diversity, Community Structure, and Antagonism of Endophytic Fungi from Asymptomatic and Symptomatic Mongolian Pine Trees
Source: MDPI journal article supplement (doi:10.3390/jof10030212), 2024-03-13
Supplement: s1 [file s1]

Figure S1: ANOSIM analysis of endophytic fungal communities from symptomatic and asymptomatic trees.

Figure S2: ANOSIM analysis of endophytic fungal communities in A (needles), B (shoots), and C (phloem) samples.

Figure S3: Box plots of ACE and Chao1 indices for samples of symptomatic and asymptomatic pine.

Figure S4: Boxplots of Simpson and Shannon indices for samples of symptomatic and asymptomatic pine.

Figure S5: Box plots of ACE and Chao1 indices for needles, shoots and phloem samples of asymptomatic pine.

Figure S6: Box plots of Simpson and Shannon indices for needles, shoots and phloem samples of asymptomatic pine.

Figure S7: Box plots of ACE and Chao1 indices for needles, shoots and phloem samples of symptomatic pine.

Figure S8: Box plots of Simpson and Shannon indices for needles, shoots and phloem samples of symptomatic pine.
