# Supplementary material for: Diversity, Community Structure, and Antagonism of Endophytic Fungi from Asymptomatic and Symptomatic Mongolian Pine Trees
Source: J Fungi (Basel). 2024 Mar 13;10(3):212. doi: 10.3390/jof10030212 (PMC10971010; doi:10.3390/jof10030212)
Supplement: Supplementary file 1 [file jof-10-00212-s001.zip]

Archive with 9 entries (9 files):
- Figure S1-Figure S8.pdf
- Figure S1.png
- Figure S2.png
- Figure S3.jpg
- Figure S4.jpg
- Figure S5.jpg
- Figure S6.jpg
- FigureS7.jpg
- FigureS8.jpg
